# Supplementary material for: A viscosity measurement technique for ultra-low sample volumes
Source: Royal Society of Chemistry journal article supplement (doi:10.1039/d4sm00050a), 2024-01-01
Supplement: d4sm00050a1.pdf [file d4sm00050a1.pdf]

## Supplementary Material

### **A viscosity measurement technique for ultra-low sample volumes.**

Mahrukh A Mir & Mahesh S Tirumkudulu

Department of Chemical Engineering, Indian Institute of Technology Bombay, Powai,

Mumbai 400076, India

#### **I. DETAILS OF LIQUID SAMPLES AND AVAILABLE BLADE SPEEDS**

The following tables contain the measured values of surface tension using a goniometer, the various blade speeds available on smearbot, and the measured viscosity from both the smearing technique and the rheometer.

| No. | Sample | Concentration | Name                      | Surface Tension (N/m) |
|-----|--------|---------------|---------------------------|-----------------------|
| 1   | S1     | 7.5%          | Opadry 85F                | 0.045                 |
| 2   | S2     | 3.5%          | Opadry 33G                | 0.055                 |
| 3   | S3     | 8%            | Aquarius                  | 0.043                 |
| 4   | S3     | 10%           | Aquarius                  | 0.037                 |
| 5   | S3     | 12%           | Aquarius                  | 0.038                 |
| 6   | S3     | 15%           | Aquarius                  | 0.037                 |
| 7   | S4     | 4%            | Sheffcoat TF              | 0.045                 |
| 8   | S4     | 10%           | Sheffcoat TF              | 0.050                 |
| 9   | S5     | 4%            | Vivacoat                  | 0.043                 |
| 10  | S6     | 4%            | Opadry 277U               | 0.039                 |
| 11  | S7     | 7.5%          | Opadry 272A               | 0.036                 |
| 12  | S8     | 3%            | Opadry 266A               | 0.049                 |
| 13  | S9     | 0.44%         | Ethyl cellulose + ethanol | 0.022                 |
| 14  | S10    | 1%            | HPMC + water              | 0.040                 |
| 15  | S10    | 1.5%          | HPMC + water              | 0.042                 |

| No. | Sample | Concentration | Name               | Surface Tension (N/m) |
|-----|--------|---------------|--------------------|-----------------------|
| 16  | S10    | 2%            | HPMC + water       | 0.053                 |
| 17  | S11    | 10%           | Ludox solution     | 0.029                 |
| 18  | S8     | 1.5%          | Opadry 266A (dyed) | 0.039                 |
| 19  | S8     | 1%            | Opadry 266A (dyed) | 0.0367                |
| 20  | S8     | 0.75%         | Opadry 266A (dyed) | 0.0378                |
| 21  | S8     | 0.5%          | Opadry 266A (dyed) | 0.0361                |
| 22  | S1     | 2.5%          | Opadry 85F (dyed)  | 0.042                 |
| 23  | S1     | 5%            | Opadry 85F (dyed)  | 0.035                 |
| 24  | S1     | 10%           | Opadry 85F (dyed)  | 0.0382                |
| 25  | S2     | 2.5%          | Opadry 33G(dyed)   | 0.040                 |
| 26  | S2     | 5%            | Opadry 33G(dyed)   | 0.0385                |
| 27  | S12    | 20%           | Ludox solution     | 0.030                 |

TABLE S1. Samples used for viscosity measurement. The surface tension was measured on a goniometer.

| $U_0$ | $U_1$ | $U_2$ | $U_3$ | $U_4$ | $U_5$ | $U_6$ | $U_7$ |
|-------|-------|-------|-------|-------|-------|-------|-------|
| 44.4  | 48.3  | 55.4  | 62.4  | 73.2  | 90.5  | 109.3 | 143.2 |

TABLE S2. List of eight blade speeds (mm/s) available on Smearbot.

| No | Sample                      | Rheometer (mPa.s) | Smearing Technique (mPa.s) |
|----|-----------------------------|-------------------|----------------------------|
| 1  | S1.2.5% Opadry 85F (+dye)   | 2.0               | 2.2                        |
| 2  | S1.5% Opadry 85F (+dye)     | 2.8               | 2.9                        |
| 3  | S1.7.5% Opadry 85F          | 5.1               | 4.9                        |
| 4  | S1.10% Opadry 85F (+dye)    | 6.5               | 6.4                        |
| 5  | S2.2.5% Opadry 33G (+dye)   | 2.7               | 2.6                        |
| 6  | S2.3.5%Opadry 33G           | 4.7               | 4.3                        |
| 7  | S2.5% Opadry 33G (+dye)     | 5.9               | 5.9                        |
| 8  | S3.8% Aquarius (+dye)       | 3.1               | 3.4                        |
| 9  | S3.10% Aquarius             | 3.9               | 4.3                        |
| 10 | S3.12%Aquarius              | 5.5               | 6.5                        |
| 11 | S3.15% Aquarius             | 9.8               | 9.9                        |
| 12 | S4.4% Sheffcoat TF          | 2.4               | 2.4                        |
| 13 | S4.10% Sheffcoat TF         | 6.4               | 8.1                        |
| 14 | S5.4% Vivacoat              | 3.1               | 3.7                        |
| 15 | S6.4% Opadry 277U           | 3.9               | 4.3                        |
| 16 | S7.7.5% Opadry 272A         | 3.9               | 3.6                        |
| 17 | S8.3% Opadry 266A           | 7.9               | 8.2                        |
| 18 | S8.0.5% Opadry 266A (+dye)  | 2.8               | 3.1                        |
| 19 | S8.0.75% Opadry 266A (+dye) | 4.1               | 4.3                        |
| 20 | S8.1% Opadry 266A (+dye)    | 6.1               | 6.5                        |
| 21 | S8.1.5% Opadry 266A (+dye)  | 12.5              | 12.5                       |
| 22 | S9.0.44% Ethyl Cellulose    | 3.4               | 3.6                        |
| 23 | S10.1% HPMC + water         | 3.9               | 3.4                        |
| 24 | S10.1.5%HPMC+water          | 4.3               | 4.2                        |

| <b>No</b> | <b>Sample</b>       | <b>Rheometer (mPa.s)</b> | <b>Smearing Technique (mPa.s)</b> |
|-----------|---------------------|--------------------------|-----------------------------------|
| 25        | S10_2% HPMC + water | 6.5                      | 6.7                               |
| 26        | 10%Ludox            | 2.5                      | 1.9                               |
| 27        | 20%Ludox            | 3.6                      | 2.9                               |
| 28        | Donor Blood         | 4.8                      | 4.6                               |
| 29        | Blood plasma        | 2.3                      | 1.8                               |

TABLE S3. The table lists 28 different viscosity fluids with comparison of viscosity measured on Smearbot with that on Rheometer. The symbol “(+dye)” refers to the addition of a small amount of dye to the samples. Both surface tension and viscosity were measured after addition of dye.
